# Supplementary material for: A hydrostable CuII coordination network prepared hydrothermally as a “turn-on” fluorescent sensor for S2− and a selective adsorbent for methylene blue
Source: Royal Society of Chemistry journal article supplement (doi:10.1039/d1dt04283a), 2022-01-01
Supplement: d1dt04283a1.pdf [file d1dt04283a1.pdf]

## Supporting Information

### A hydrostable Cu<sup>II</sup> coordination network prepared hydrothermally as “turn-on” fluorescent sensor for S<sup>2-</sup> and selective adsorbent for methylene blue

*Xin-Xin Yu, Hao Cheng, Xuan Li, Ya-Jun Li, Xue-Qin Song\**

a. School of Chemistry and Chemical Engineering, Lanzhou Jiaotong University, Lanzhou, 730070, China.

#### Contents

|                                                                                                                                                                                                                                                                                                                    |    |
|--------------------------------------------------------------------------------------------------------------------------------------------------------------------------------------------------------------------------------------------------------------------------------------------------------------------|----|
| <b>Materials and Instruments</b> .....                                                                                                                                                                                                                                                                             | S2 |
| <b>The synthesis of CuCP</b> .....                                                                                                                                                                                                                                                                                 | S2 |
| <b>Crystallographic data collection and refinement</b> .....                                                                                                                                                                                                                                                       | S2 |
| <b>Thermal stability and chemical stability experiments</b> .....                                                                                                                                                                                                                                                  | S3 |
| <b>Sorption kinetics and isotherm</b> .....                                                                                                                                                                                                                                                                        | S3 |
| <b>Table S1</b> Crystal data and structure refinement parameters for <b>CuCP</b> .....                                                                                                                                                                                                                             | S4 |
| <b>Table S2</b> Selected bond lengths (Å) and angles (°) for <b>CuCP</b> .....                                                                                                                                                                                                                                     | S4 |
| <b>Table S3.</b> Cartesian coordinates of H <sub>4</sub> L optimized structures by DFT.....                                                                                                                                                                                                                        | S4 |
| <b>Table S4.</b> Selected bond lengths (Å) and angles (°) of Na <sub>4</sub> L optimized structure by DFT.....                                                                                                                                                                                                     | S5 |
| <b>Table S5</b> Kinetic model parameters and adsorption isotherm parameters for the adsorption of MB onto <b>CuCP</b> .....                                                                                                                                                                                        | S5 |
| <b>Fig. S1</b> The molecular structures of four dyes used.....                                                                                                                                                                                                                                                     | S6 |
| <b>Fig. S2</b> IR spectra of H <sub>4</sub> L and <b>CuCP</b> in solid state.....                                                                                                                                                                                                                                  | S6 |
| <b>Fig. S3</b> The 2D network of <b>CuCP</b> viewed along a-axis. (b) The 3D supramolecular architecture of <b>CuCP</b> constructed by multiple C-H···O hydrogen bonds.....                                                                                                                                        | S7 |
| <b>Fig. S4</b> The summary report of N <sub>2</sub> adsorption determination for <b>CuCP</b> .....                                                                                                                                                                                                                 | S7 |
| <b>Fig. S5.</b> The SEM image (a) (Inset: crystal image of <b>CuCP</b> ) and elemental analysis of <b>CuCP</b> (b) (Inset: crystal image of Na <sub>2</sub> S treated <b>CuCP</b> ); The SEM (c) and elemental analysis of the black sediments obtained upon <b>CuCP</b> treated with Na <sub>2</sub> S(d).....    | S7 |
| <b>Fig. S6</b> The PXRD patterns of black solid obtained upon <b>CuCP</b> treated with Na <sub>2</sub> S and the standard pattern of CuS(PDF41-1474).....                                                                                                                                                          | S8 |
| <b>Fig. S7</b> The emission spectra of H <sub>4</sub> L in water and that upon addition of Na <sub>2</sub> S when excited at 320 nm.....                                                                                                                                                                           | S8 |
| <b>Fig. S8</b> The IR spectrum of H <sub>4</sub> L and Na <sub>4</sub> L obtained from Na <sub>2</sub> S recognized by <b>CuCP</b> .....                                                                                                                                                                           | S9 |
| <b>Fig. S9</b> The XPS spectrum of the white solid obtained from the Na <sub>2</sub> S treated <b>CuCP</b> suspension (a) as well as that obtained from the reaction of H <sub>4</sub> L and NaOH(b); Na 1s XPS for the white solid obtained from the Na <sub>2</sub> S treated <b>CuCP</b> suspension (c) as well |    |

as that obtained from the reaction of H<sub>4</sub>L and NaOH(d); O 1s XPS for the white solid obtained from the Na<sub>2</sub>S treated **CuCP** suspension (e) as well as that obtained from the reaction of H<sub>4</sub>L and NaOH(f) -----S9

**Fig. S10** The fluorescence response of **CuCP** to Na<sub>2</sub>S(a), H<sub>2</sub>S (b) and (NH<sub>4</sub>)<sub>2</sub>S (c) with concentrations ranging from 0~140 μM in tap water upon excited at 320 nm; The linear fitting observed at 0~70 μM for Na<sub>2</sub>S(d), H<sub>2</sub>S (e) and (NH<sub>4</sub>)<sub>2</sub>S (f)----- S10

**Fig. S11** FT-IR spectra of **CuCP**, MB and **CuCP@MB**-----S10

**References**-----S11

## Materials and Instruments

All reagents used were analytical reagents and commercially available. IR data were tested by using a Thermo Mattson FTIR spectrometer. Powder X-ray diffraction (PXRD) was obtained on a Rigaku D/Max 2200PC diffractometer with Cu K $\alpha$  radiation. Elemental analysis data of carbon, nitrogen, and hydrogen were tested using a Thermo Flash 2000 elemental analyzer. In a N<sub>2</sub> atmosphere, thermogravimetric analysis (TGA) was performed with a TGA/ NETZSCH STA449C instrument at a heating rate of 5 °C/min. Fluorescence data were collected by using F-7000 fluorescence spectrophotometer at F-7000 fluorescence spectrophotometer (Japan Hitachi company). The emission spectra of H<sub>4</sub>L and **CuCP** in solid state at room were determined by putting the powdered solid samples between quartz plates under the exactly same experimental condition where the excitation and emission slits were 5 nm and 5 nm, voltage was 700 V and scan speeds were 1200 nm/min. Ultraviolet-visible (UV-vis) absorption spectral data were executed with a UV-1800 Shimadzu spectrophotometer.

## The Synthesis Steps of CuCP

The synthesis of [Cu<sub>2</sub>L(H<sub>2</sub>O)<sub>2</sub>]<sub>n</sub> (**CuCP**). The mixture of H<sub>4</sub>L (0.01 mmol, 4.1 mg), Cu(NO<sub>3</sub>)<sub>2</sub>·3H<sub>2</sub>O (0.02 mmol) and 6 mL H<sub>2</sub>O was sealed in a polytetrafluoroethylene liner high pressure reactor (25 mL) and heated at 140 °C for 3 days , and then cool to room temperature at a rate of 5 °C·h<sup>-1</sup>. The green rod-shaped single crystal washed with water was collected by filtration and the test samples could be obtained by repeating the experiment.

## Crystallographic Data Collection and Refinement

Single crystals of **CuCP** with approximate dimensions of  $0.37 \times 0.15 \times 0.15 \text{ mm}^3$  suitable for X-ray diffraction were obtained in moderate yield by solvothermal method. Crystal data of **CuCP** was collected on a Bruker APEX-II CCD diffractometer (Cu K $\alpha$  radiation,  $\lambda = 0.71073 \text{ \AA}$ ) at 100 K. Structures were solved by direct methods and refined by a full matrix least-squares technique based on  $F^2$  using the SHELXL 2014 program.<sup>1</sup> All of the non-hydrogen atoms were refined anisotropically. The organic hydrogen atoms were generated geometrically. Disordered phenylic H and uncoordinated carboxyl H for **CuCP** was not located but are included in their formulas. Drawings of the molecules were performed with the program Diamond.<sup>3</sup> Crystallographic data as well as details of data collection and refinement for these complexes are summarized in Table S1, important bond lengths are listed in Table S2.

### Thermal Stability and Chemical Stability Experiments

The thermogravimetric analysis (TGA) experiment of **CuCP** at 25~800 °C was carried out under N<sub>2</sub> atmosphere to evaluate its thermal stability. The Powder X-ray diffraction (PXRD) experiments were performed to verify the chemical and water stability by soaking **CuCP** in deionized water for two weeks and aqueous solutions of different pH values (2 ~ 12) treated by HCl or NaOH for 48 hours.

### Sorption Kinetics and isotherm

The linear forms of pseudo first and second order kinetic model are expressed as the following equations:

$\ln(Q_e - Q_t) = \ln Q_t - k_1 t$  Pseudo first order kinetic model

$$\frac{t}{Q_t} = \frac{1}{Q_e^2 k_2} + \frac{t}{Q_e} \quad \text{Pseudo first order kinetic model}$$

where  $Q_e$  and  $Q_t$  are the amounts of MB (mg/g) adsorbed onto the adsorbent at equilibrium and at a given time  $t$  (min), respectively;  $k_1$  and  $k_2$  are the pseudo first and second order rate constants (g/mg/min), respectively.

The Langmuir isotherm is represented as following equation:

$$\frac{C_e}{Q_e} = \frac{1}{Q_m k_L} + \frac{C_e}{Q_m}$$

where  $C_e$  is the equilibrium iodine concentration (mg/L),  $Q_m$  is the maximum adsorption capacity (mg/g),  $k_L$  is the Langmuir adsorption isotherm constant (L/mg).

The Freundlich isotherm is represented as following equation:

$$\ln Q_e = \ln k_F + \frac{1}{n} \ln C_e$$

where the  $k_F$  and  $n$  are the Freundlich adsorption isotherm constants.

**Table S1.** Crystal data and structure refinement parameters for **CuCP**.

| Compound                                     | <b>CuCP</b>                                                                                |
|----------------------------------------------|--------------------------------------------------------------------------------------------|
| CCDC number                                  | 20114829                                                                                   |
| Empirical formula                            | C <sub>10</sub> H <sub>10</sub> NO <sub>7</sub> Cu                                         |
| Temperature (K)                              | 173.20(10)                                                                                 |
| Formula weight                               | 318.98                                                                                     |
| Diffraction                                  | CuK $\alpha$ (1.54184 Å)                                                                   |
| Crystal system, Space group                  | Monoclinic, C2/c                                                                           |
| Unit cell dimensions                         | $a = 14.0500(9)$ Å<br>$b = 5.0906(3)$ Å; $\beta = 104.268(6)^\circ$<br>$c = 26.2723(16)$ Å |
| $V/\text{Å}^3, Z$                            | 1821.1(2), 8                                                                               |
| $D_{\text{calcd}}/\text{Mg m}^{-3}$          | 2.070                                                                                      |
| $\mu/\text{mm}^{-1}$                         | 3.543                                                                                      |
| $F(000)$                                     | 1136                                                                                       |
| $\theta$ range for data collection           | $3.472^\circ \sim 66.548^\circ$                                                            |
| index ranges, $hkl$                          | $-16 \leq h \leq 15; -6 \leq k \leq 6; -30 \leq l \leq 31$                                 |
| Independent reflections ( $R_{\text{int}}$ ) | 0.0586                                                                                     |
| Completeness                                 | 97.7%                                                                                      |
| Reflections unique / collected               | 1773 / 1773                                                                                |
| Data / restraints / params                   | 1773 / 0 / 156                                                                             |
| Goodness-of-fit on $F^2$                     | 1.055                                                                                      |
| Final $R$ indices [ $I > 2\sigma(I)$ ]       | $R_1 = 0.0447, wR_2 = 0.1248$                                                              |
| $R$ indicCs (all data)                       | $R_1 = 0.0456, wR_2 = 0.1257$                                                              |

**Table S2.** Selected bond lengths (Å) and angles ( $^\circ$ ) for **CuCP**.

|                      |                      |                      |                     |                 |
|----------------------|----------------------|----------------------|---------------------|-----------------|
| Cu1–O1 1.985(3)      | Cu1–O3 2.161(3)      | Cu1–O3 1.939(3)      | Cu1–O5 2.218(3)     | Cu1–N1 1.893(4) |
| O1–Cu1–O5 98.35(13)  | O1–Cu1–O3 159.50(12) | O3–Cu1–O 1 97.45(13) | O3–Cu1–N3 99.29(8)  |                 |
| O3–Cu1–O5 89.37(12)  | O3–Cu1–O5 102.89(13) | N1–Cu1–O5 97.75(13)  | N1–Cu1–O3 78.59(13) |                 |
| N1–Cu1–O3 159.25(15) | N1–Cu1–O1 81.5(19)   |                      |                     |                 |

**Table S3.** Cartesian coordinates of H<sub>4</sub>L optimized structures by DFT.

B3LYP/6–31G in gas phase, Charge = 0 Multiplicity = 3

|   |          |          |          |   |          |          |          |
|---|----------|----------|----------|---|----------|----------|----------|
| C | 1.38592  | -0.0008  | 0.00032  | C | 3.63679  | 1.20042  | -0.00677 |
| C | 0.67534  | -1.20984 | 0.00779  | C | 3.63675  | -1.20253 | 0.00694  |
| C | -0.71794 | -1.20706 | 0.00627  | C | 5.04274  | 1.14923  | -0.00737 |
| C | -1.41721 | -0.00032 | 0.00004  | H | 3.11688  | 2.16686  | -0.01178 |
| C | -0.71755 | 1.20615  | -0.00609 | C | 5.04276  | -1.15085 | 0.0056   |
| C | 0.67578  | 1.20845  | -0.0074  | H | 3.1172   | -2.16917 | 0.01278  |
| H | 1.22328  | -2.1641  | 0.00721  | N | 5.7446   | -0.00069 | -0.00134 |
| H | -1.26652 | -2.16039 | 0.0089   | C | 5.87883  | 2.44248  | -0.01524 |
| H | -1.26578 | 2.15968  | -0.00879 | C | 5.87922  | -2.44387 | 0.01246  |
| H | 1.224    | 2.16254  | -0.00667 | O | 5.22448  | 3.71397  | -0.02205 |
| C | -2.95721 | -0.00008 | -0.00009 | H | 4.59219  | 3.75283  | 0.69927  |
| C | -3.65454 | 1.20829  | -0.00633 | O | 7.13588  | 2.38418  | -0.01571 |
| C | -3.6549  | -1.20786 | 0.00591  | O | 5.22524  | -3.71554 | 0.0203   |
| C | -5.04925 | 1.20879  | -0.00587 | H | 4.50362  | -3.70869 | -0.6128  |
| H | -3.10419 | 2.16032  | -0.01028 | O | 7.13625  | -2.38521 | 0.01119  |
| C | -5.05004 | -1.20754 | 0.00537  | O | -5.10246 | -3.77819 | 0.01758  |
| H | -3.10545 | -2.16034 | 0.01065  | H | -5.72444 | -4.50945 | 0.01522  |
| N | -5.74727 | 0.00051  | -0.00039 | O | -7.07746 | 2.54772  | -0.01148 |
| C | -5.81998 | -2.54124 | 0.01142  | O | -5.10145 | 3.77945  | -0.01789 |
| C | -5.81907 | 2.54256  | -0.01187 | H | -5.72331 | 4.51076  | -0.00915 |
| O | -7.07836 | -2.54629 | 0.01095  | C | 2.92592  | -0.0011  | 0.00066  |

**Table S4.** Selected bond lengths (Å) and angles (°) of Na<sub>4</sub>L optimized structure by DFT.

|              |       |              |       |              |       |
|--------------|-------|--------------|-------|--------------|-------|
| O31–Na39     | 2.321 | O38–Na41     | 2.247 | C28–O37–Na41 | 88.74 |
| O32–Na39     | 2.248 | O35–Na42     | 2.351 | C29–O31–Na39 | 87.07 |
| O33–Na40     | 2.28  | O36–Na42     | 2.247 | C29–O32–Na39 | 89.64 |
| O34–Na40     | 2.247 | O37–Na41     | 2.250 | C30–O33–Na40 | 87.94 |
| C30–O34–Na40 | 88.98 | C27–O36–Na42 | 90.19 | C27–O35–Na42 | 86.31 |
| C28–O38–Na41 | 88.38 | O31–C39–O39  | 60.54 |              |       |

**Table S5.** Kinetic model and adsorption isotherm parameters for the adsorption.

| Model                     | Parameters | $k$                     | $Q_{cal}$   | $R^2$ |
|---------------------------|------------|-------------------------|-------------|-------|
| Pseudo first order model  |            | 0.015 min <sup>-1</sup> | 376.57 mg/g | 0.82  |
| Pseudo second order model |            | 0.006 g/mg/min          | 380.32 mg/g | 0.99  |
| Langmuir isotherm         |            | 0.036 L/mg              | 375.97 mg/g | 0.99  |
| Freundlich isotherm       |            | 0.19 mg/g               | 395.67 mg/g | 0.90  |

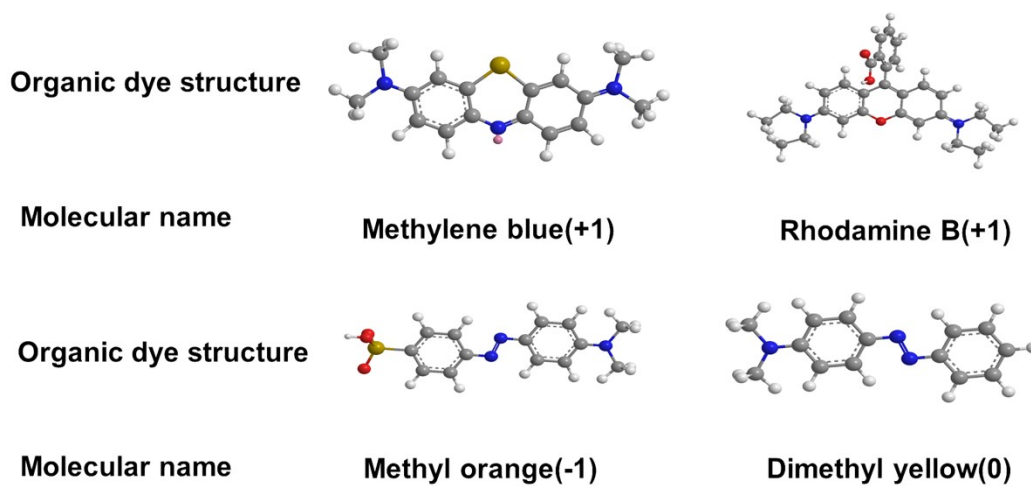

Fig. S1. The molecular structures of four dyes used.

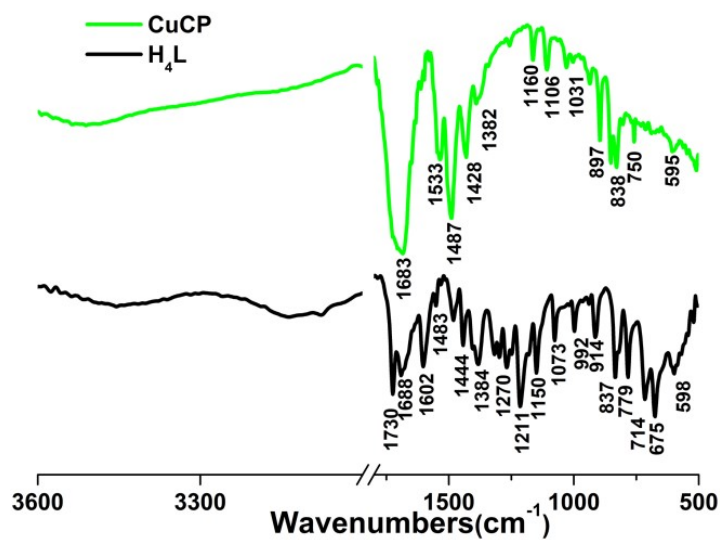

Fig. S2. IR spectra of H<sub>4</sub>L and CuCP in solid state.

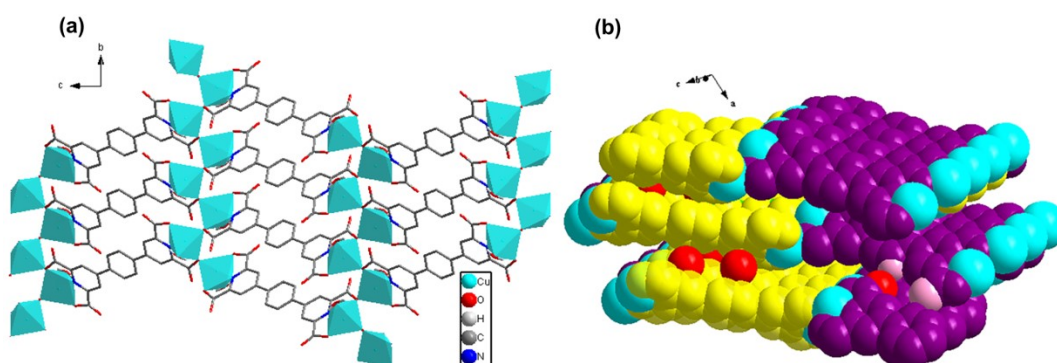

Fig. S3. (a) The 2D network of CuCP viewed along a-axis. (b) The 3D supramolecular architecture of CuCP constructed by multiple C-H...O hydrogen bonds.

Sample: L-Cu-----BET  
 Operator:  
 Submitter:  
 File: D:\005-477.SMP

Started: 7/22/2021 10:47:34PM  
 Completed: 7/22/2021 11:57:26PM  
 Report Time: 9/22/2021 15:09:11PM  
 Warm Free Space: 20.1496 cm<sup>3</sup>?Measured  
 Equilibration Interval: 10 s  
 Sample Density: 1.900 g/cm<sup>3</sup>

Analysis Adsorptive: N<sub>2</sub>  
 Analysis Bath Temp.: -195.800  
 Sample Mass: 0.0901 g  
 Cold Free Space: 59.9514 cm<sup>3</sup>?Measured  
 Low Pressure Dose: None  
 Automatic Degas: No

**Summary Report**

**Surface Area**

Single point surface area at P/P<sub>0</sub> = 0.046838711: 1.4468 m<sup>2</sup>/g

BET Surface Area: 1.4593 m<sup>2</sup>/g

**Fig. S4.** The summary report of N<sub>2</sub> adsorption determination for CuCP.

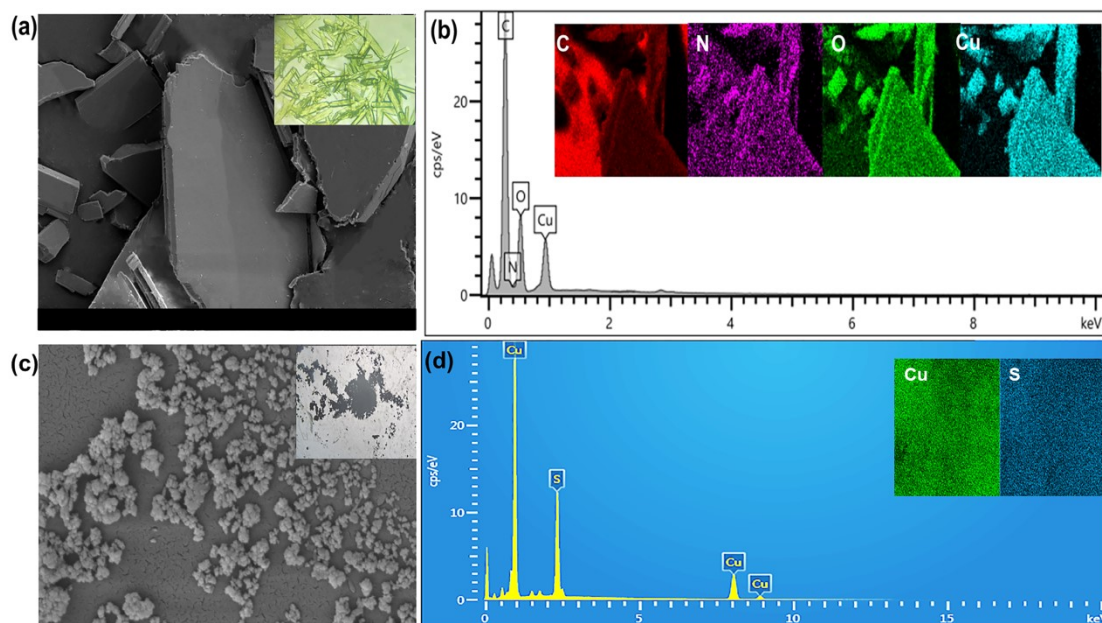

**Fig. S5.** The SEM image (a) (Inset: crystal image of CuCP ) and elemental analysis of CuCP (b) (Inset: crystal image of Na<sub>2</sub>S treated CuCP ); The SEM (c) and elemental analysis of the black sediments obtained upon CuCP treated with Na<sub>2</sub>S (d).

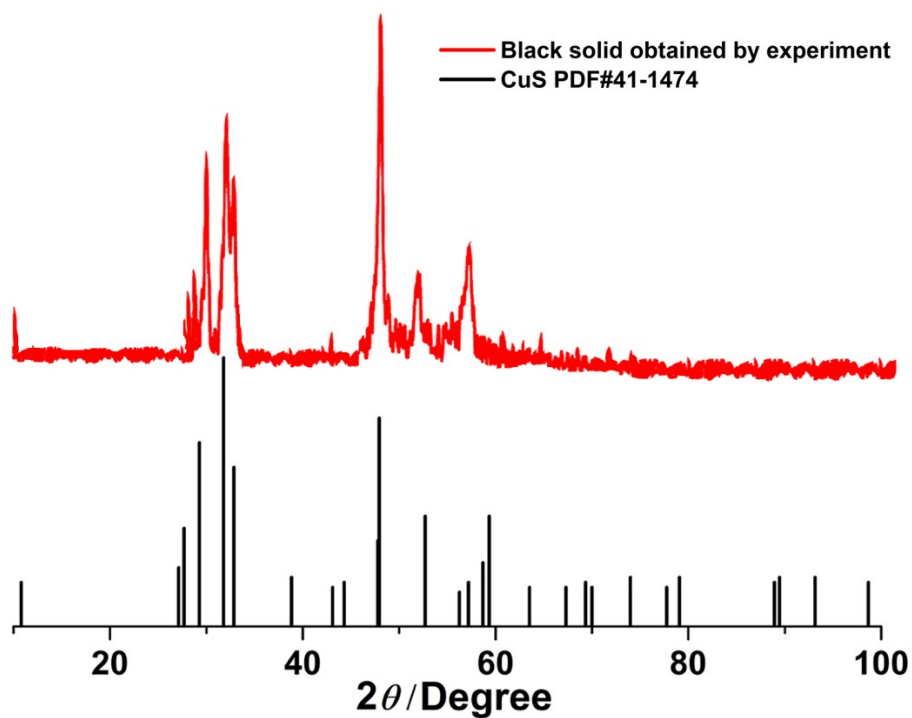

Fig. S6. The PXRD patterns of black solid obtained upon **CuCP** treated with  $\text{Na}_2\text{S}$  and the standard pattern of **CuS** (PDF41-1474).

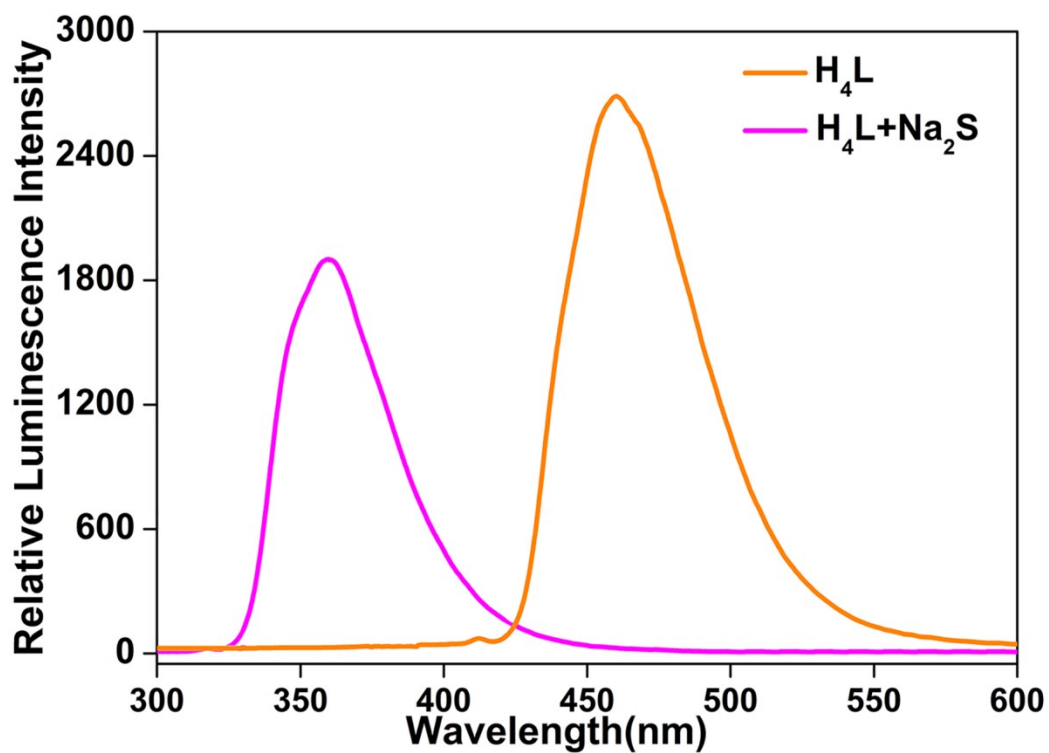

Fig. S7. The emission spectra of  $\text{H}_4\text{L}$  in water and that upon addition of  $\text{Na}_2\text{S}$  when excited at 320nm.



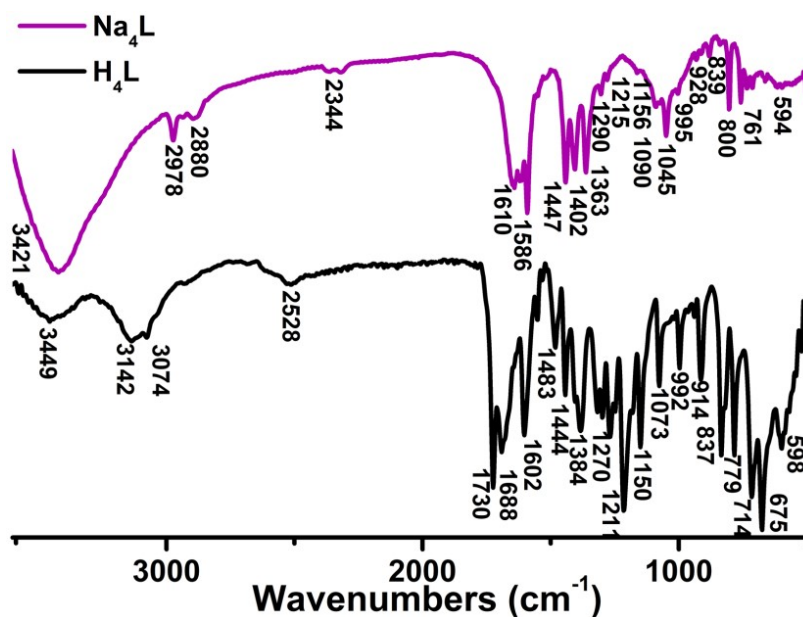

**Fig. S8.** The IR spectrum of  $\text{H}_4\text{L}$  and  $\text{Na}_4\text{L}$  obtained from  $\text{Na}_2\text{S}$  recognized by **CuCP**.

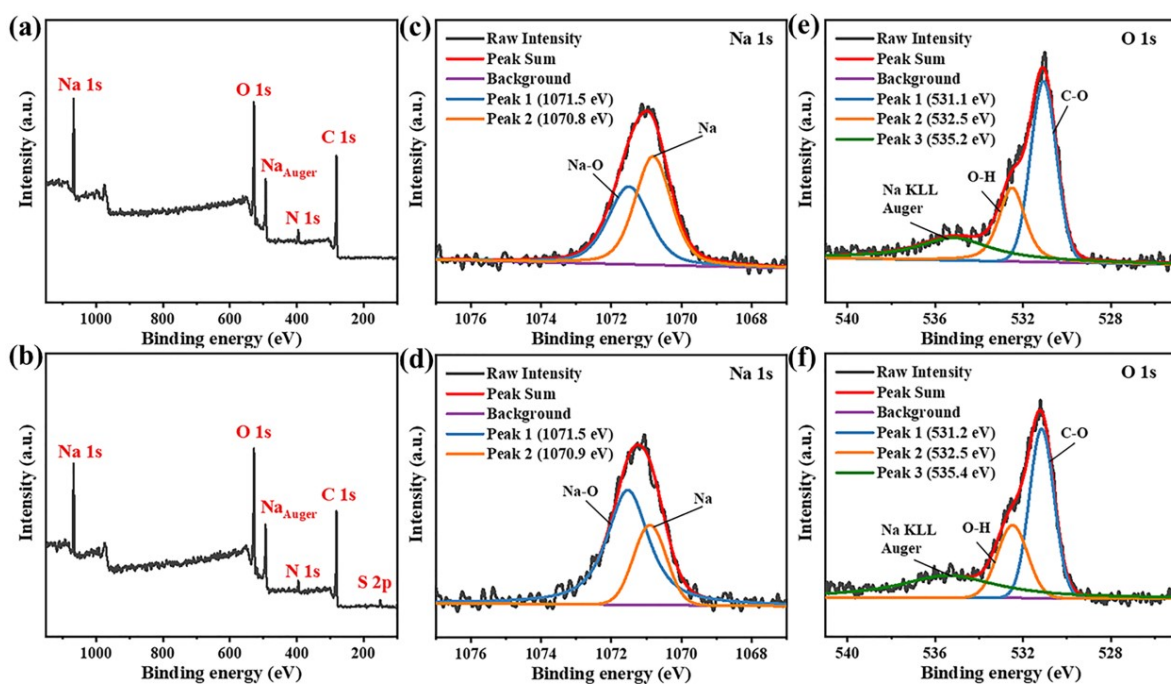

**Fig. S9.** The XPS spectrum of the white solid obtained from the  $\text{Na}_2\text{S}$  treated **CuCP** suspension (a) as well as that obtained from the reaction of  $\text{H}_4\text{L}$  and NaOH(b); Na 1s XPS for the white solid obtained from the  $\text{Na}_2\text{S}$  treated **CuCP** suspension (c) as well as that obtained from the reaction of  $\text{H}_4\text{L}$  and NaOH(d); O 1s XPS for the white solid obtained from the  $\text{Na}_2\text{S}$  treated **CuCP** suspension (e) as well as that obtained from the reaction of  $\text{H}_4\text{L}$  and NaOH(f).

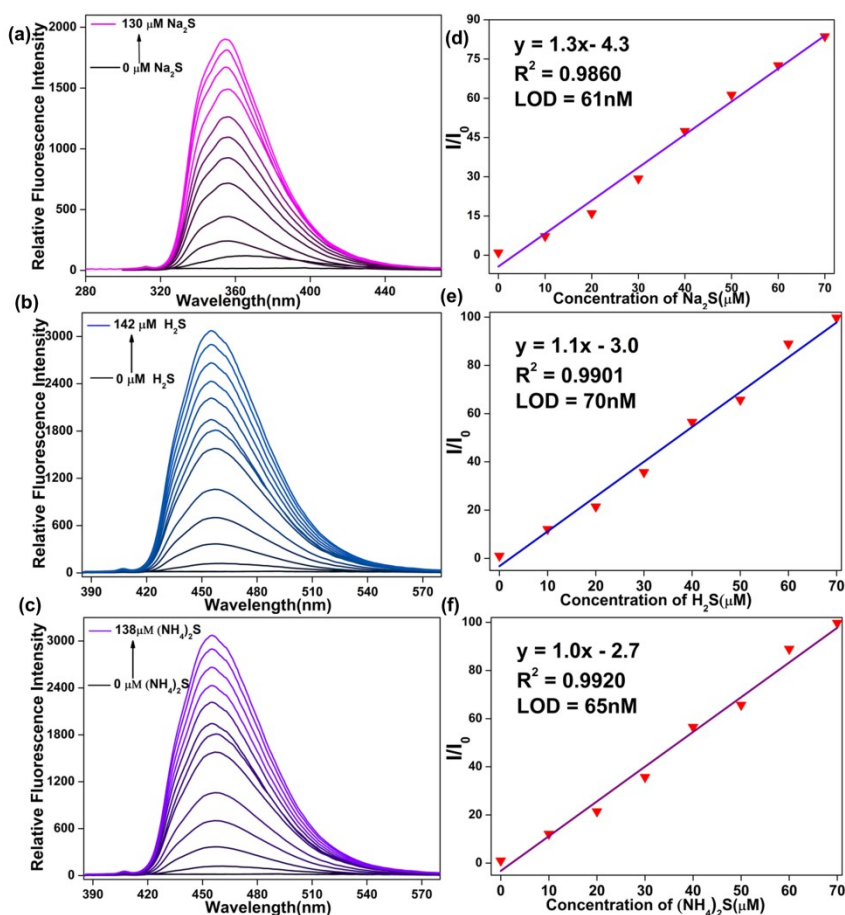

**Fig. S10.** The fluorescence response of CuCP to Na<sub>2</sub>S(a), H<sub>2</sub>S (b) and (NH<sub>4</sub>)<sub>2</sub>S (c) with concentrations ranging from 0~140 μM in tap water upon excited at 320 nm; The linear fitting observed at 0~70 μM for Na<sub>2</sub>S(d), H<sub>2</sub>S (e) and (NH<sub>4</sub>)<sub>2</sub>S (f) in tap water upon excited at 320 nm.

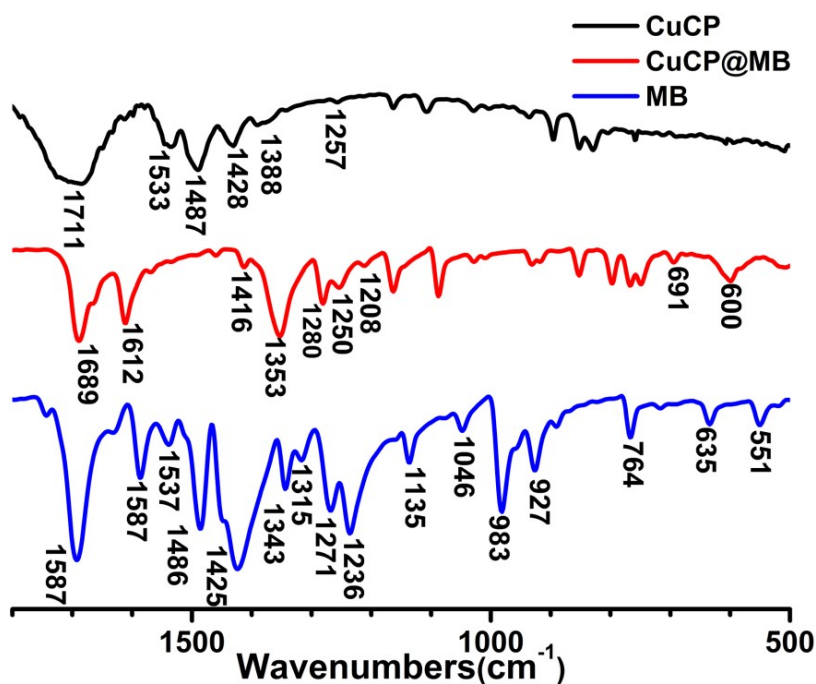

**Fig. S11.** The FT-IR spectra of MB, CuCP and CuCP@MB .

**References:**

1. Sheldrick G, SHELXTL, Reference Manual: version 5.1: Bruker AXS; Madison, WI, 2014.
2. Spek A, J. Appl.Crystallogr, 2003, 36, 7.
3. DIAMOND. version 3.1; Crystal Impact: Bonn, Germany, 2004.
